# Supplementary material for: Hierarchical CuAl-layered double hydroxide/CoWO4 nanocomposites with enhanced efficiency for use in supercapacitors with long cycling stability
Source: Royal Society of Chemistry journal article supplement (doi:10.1039/c9nj03250a), 2019-01-01
Supplement: c9nj03250a1.pdf [file c9nj03250a1.pdf]

## Electronic Supplementary Information

### Hierarchical CuAl-layered double hydroxide/CoWO<sub>4</sub> nanocomposites with enhanced efficiency in supercapacitors with long cyclic stability

Soheila Sanati,<sup>a</sup> Zolfaghar Rezvani,<sup>\*,a</sup> Reza Abazari,<sup>b</sup> Zhiquan Hou<sup>c</sup> and Hongxing Dai<sup>c</sup>

---

<sup>a.</sup> *Department of Chemistry, Faculty of Basic Sciences, Azarbaijan Shahid Madani University, Tabriz, Iran*

<sup>b.</sup> *Department of Chemistry, Faculty of Basic Sciences, Tarbiat Modares University, 14115–175, Tehran, Iran*

<sup>c.</sup> *Beijing Key Laboratory for Green Catalysis and Separation, Key Laboratory of Beijing on Regional Air Pollution Control, Key Laboratory of Advanced Functional Materials, Education Ministry of China, Laboratory of Catalysis Chemistry and Nanoscience, Department of Chemistry and Chemical Engineering, College of Environmental and Energy Engineering, Beijing University of Technology, Beijing 100124, China*

#### Corresponding Authors

\*E-mail: zrezvani@azaruniv.ac.ir (Prof. Z. Rezvani).

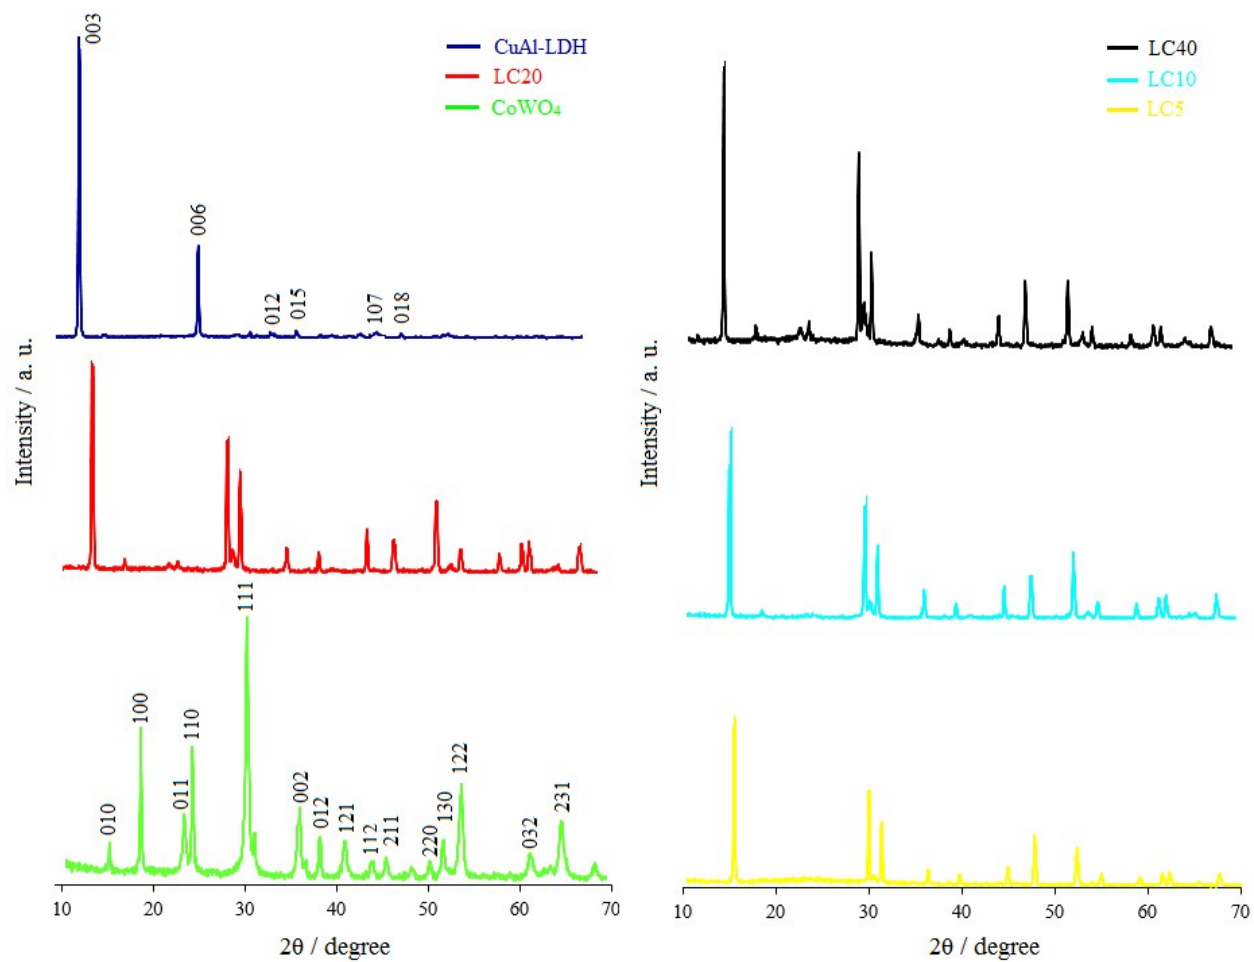

**Figure S1.** XRD patterns of CoWO<sub>4</sub>, CuAl- LDH and LC5, LC10, LC20 and LC40 samples.

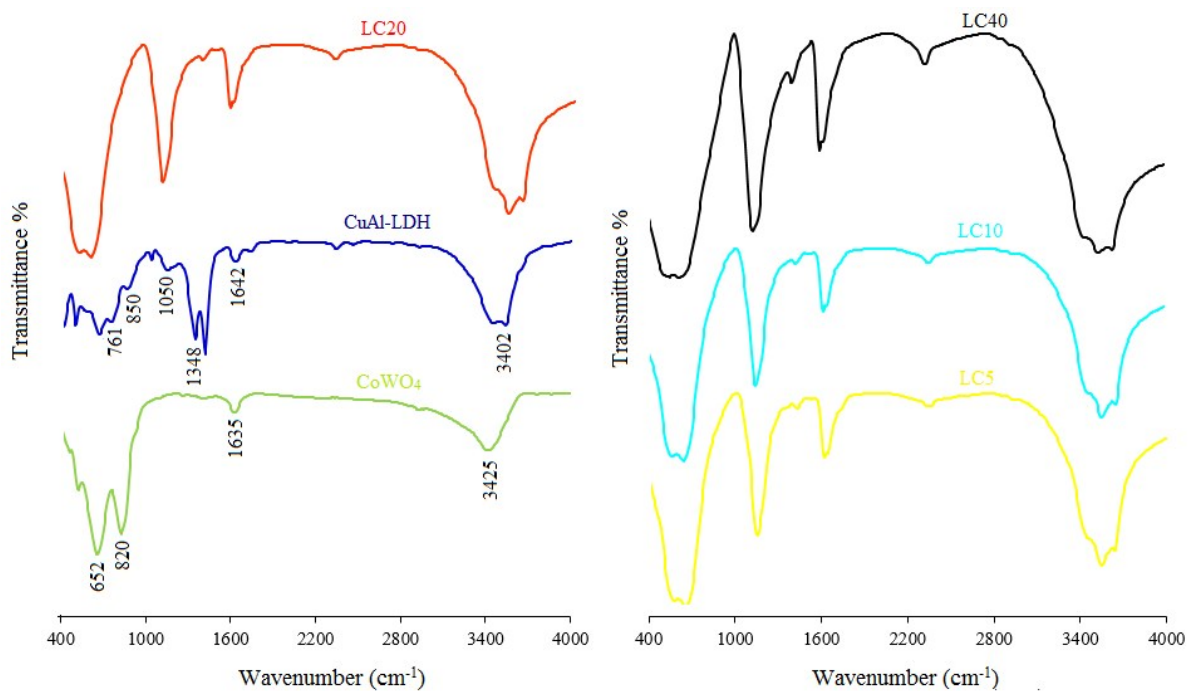

**Figure S2.** FTIR spectra of CoWO<sub>4</sub>, CuAl-LDH, LC5, LC10, LC20 and LC40 samples.

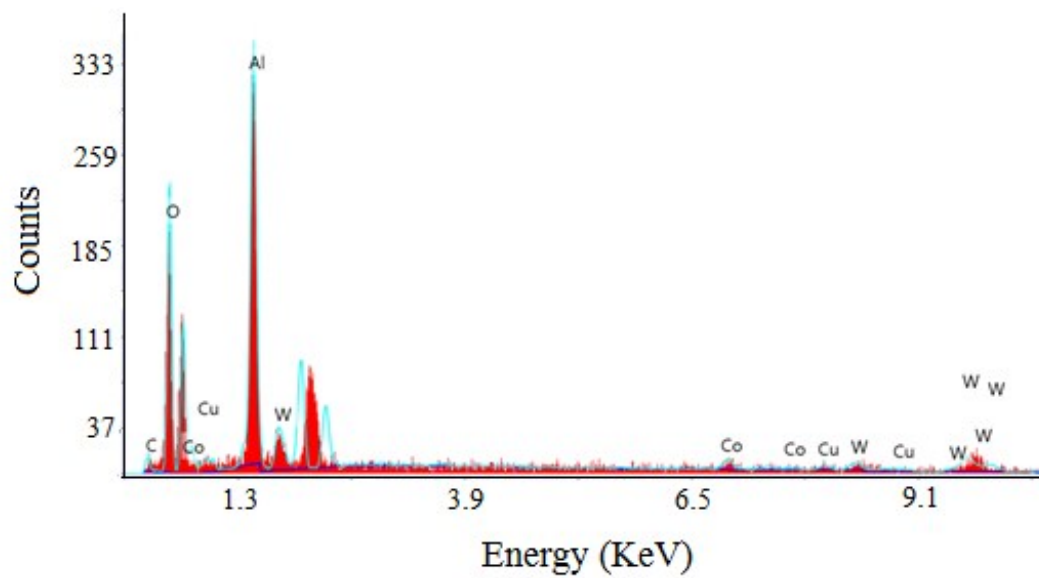

**Figure S3.** The EDAX analysis of the LC20 nanocomposite.
